# Supplementary material for: Nitrogen doped carbon dots: mechanism investigation and their application for label free CA125 analysis
Source: Royal Society of Chemistry journal article supplement (doi:10.1039/c9tb00021f), 2019-01-01
Supplement: c9tb00021f1.pdf [file c9tb00021f1.pdf]

## Supplementary data

# Nitrogen doped carbon dots: mechanism investigation and their application for label free CA125 analysis

Yuanyuan Liu<sup>a</sup>, Liping Jiang<sup>a</sup>, Bijun Li<sup>a</sup>, Xinyue Fan<sup>c</sup>, Wei Wang<sup>a</sup>, Pingping Liu<sup>b</sup>, Shenghao Xu,<sup>a\*</sup> and

Xiliang Luo<sup>a\*</sup>

a. Key Laboratory of Optic-electric Sensing and Analytical Chemistry for Life Science, MOE; Shandong Key Laboratory of Biochemical Analysis; College of Chemistry and Molecular Engineering, Qingdao University of Science and Technology, Qingdao 266042, P. R. China

<sup>b</sup> Zhengzhou Tobacco Research Institute, CNTC, Zhengzhou 450000, P. R. China

<sup>c</sup> Purdue University, 610 Purdue Mall, West Lafayette, IN, 47907

### \*Corresponding author:

Shenghao Xu ([xushenghao@qust.edu.cn](mailto:xushenghao@qust.edu.cn)); Xiliang Luo ([xiliangluo@qust.edu.cn](mailto:xiliangluo@qust.edu.cn))

Key Laboratory of Optic-electric Sensing and Analytical Chemistry for Life Science, MOE; Shandong Key Laboratory of Biochemical Analysis; College of Chemistry and Molecular Engineering, Qingdao University of Science and Technology, Qingdao 266042, P. R. China

## Contents List

**Fig. S1**.....Infrared spectroscopy of the N-CDs

**Fig. S2**.....The fluorescence stability of N-CDs

**Fig. S3**.....Fluorescence spectra of ethanediamine, CDs and N-CDs

**Fig. S4**.....The relative contents of C, N and O elements for CDs and N-CDs (determined  
by XPS)

**Fig. S5**.....Zeta potentials of N-CDs, N-CDs+CA125-aptmer and N-CDs+ CA125-aptmer+  
CA125

**Fig. S6**.....TEM image of the N-CDs after adding CA125-aptamer

**Fig. S7**.....AFM image of the heights or sizes of N-CDs after interaction with CA125-  
aptamer.

**Table S1**.....Comparison of the performance of different methods for CA125

**Table S2**.....Detection of CA125 in human serum

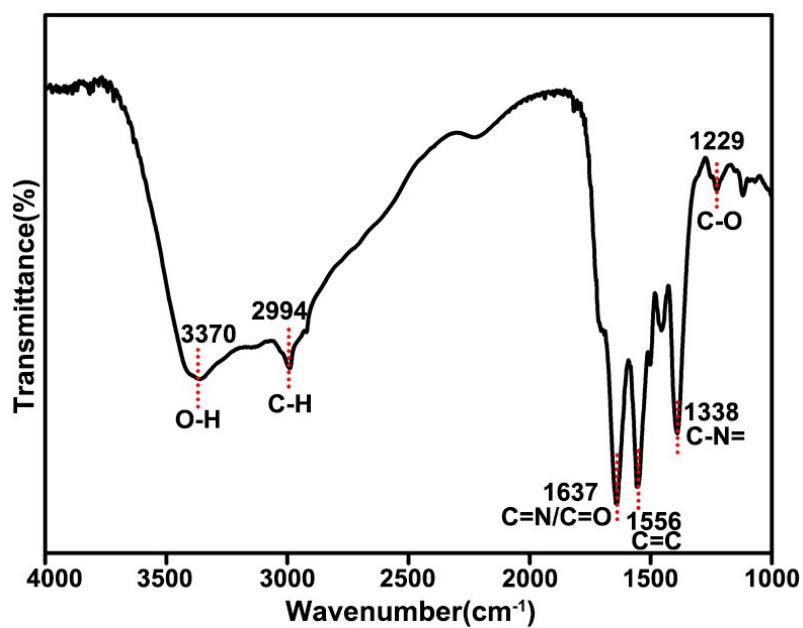

**Fig. S1** Infrared spectroscopy of the N-CDs.

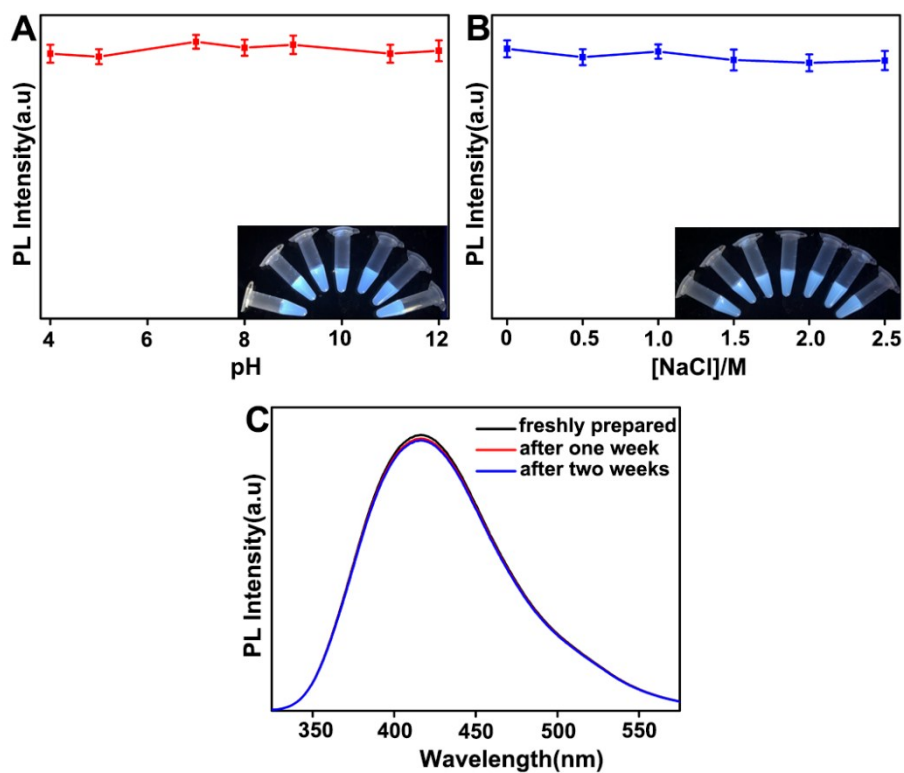

**Fig. S2** The fluorescence stability of N-CDs under (A) various pH values, (B) different concentrations of NaCl. (C) Emission spectrum of N-CDs freshly prepared (black line) and after one week (red line) and two weeks storage (blue line) at room temperature.

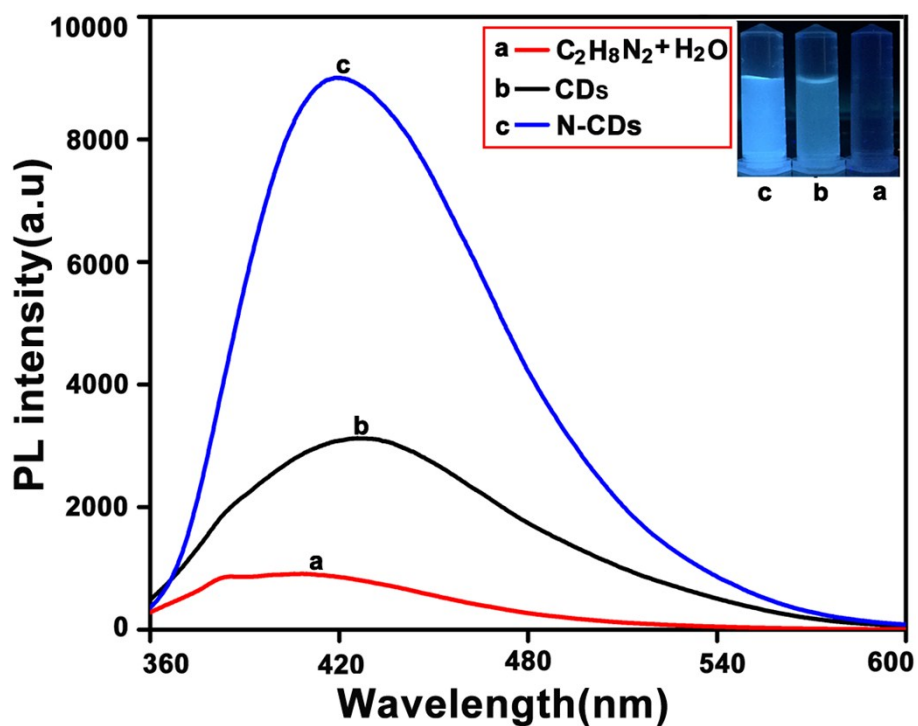

**Fig. S3** Fluorescence spectra of (a) ethanediamine, (b) CDs and (c) N-CDs. Inset shows the corresponding fluorescent image under UV lamp.

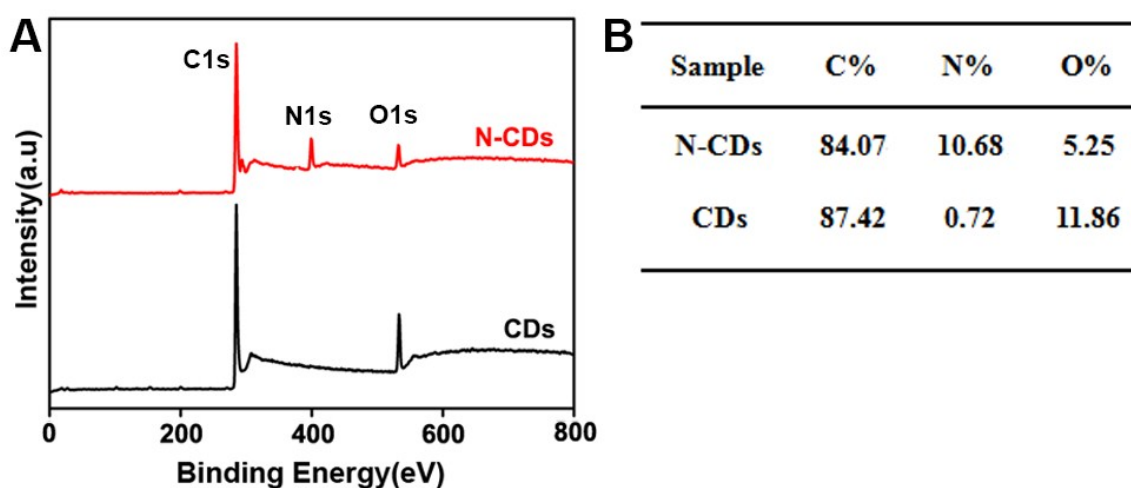

**Fig. S4** (A) XPS survey of CDs and N-CDs. (B) the relative contents of C, N and O elements for CDs and N-CDs. (determined by XPS)

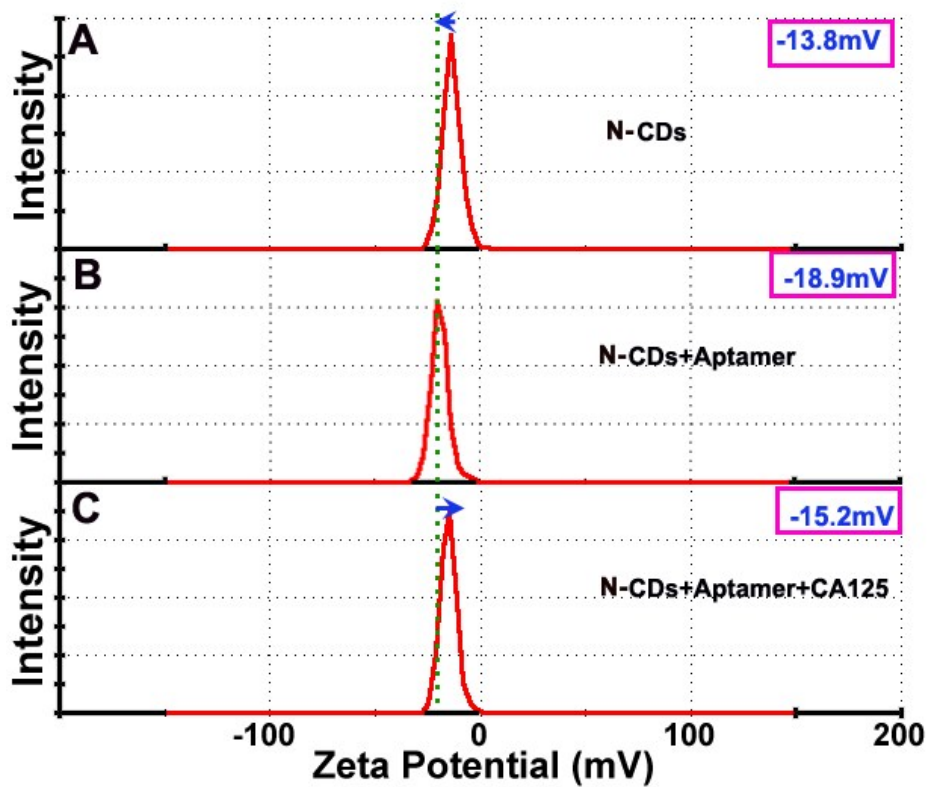

Fig. S5 Zeta potentials of N-CDs, N-CDs+CA125-aptmer and N-CDs+ CA125-aptmer+ CA125.

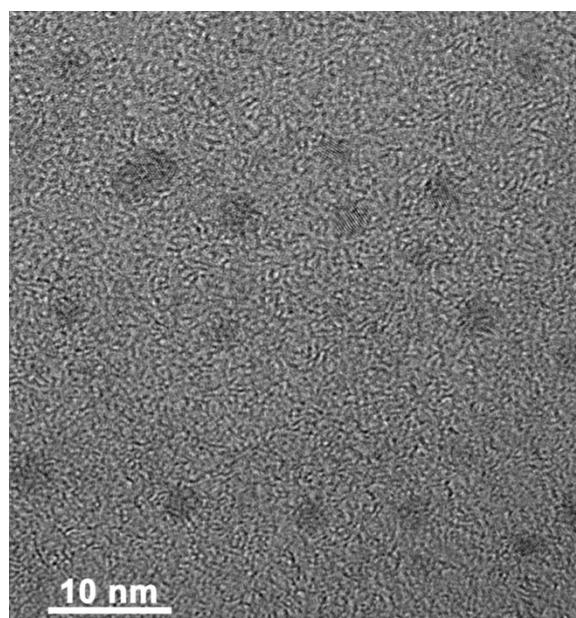

**Fig S6** TEM image of the N-CDs after adding CA125-aptamer.

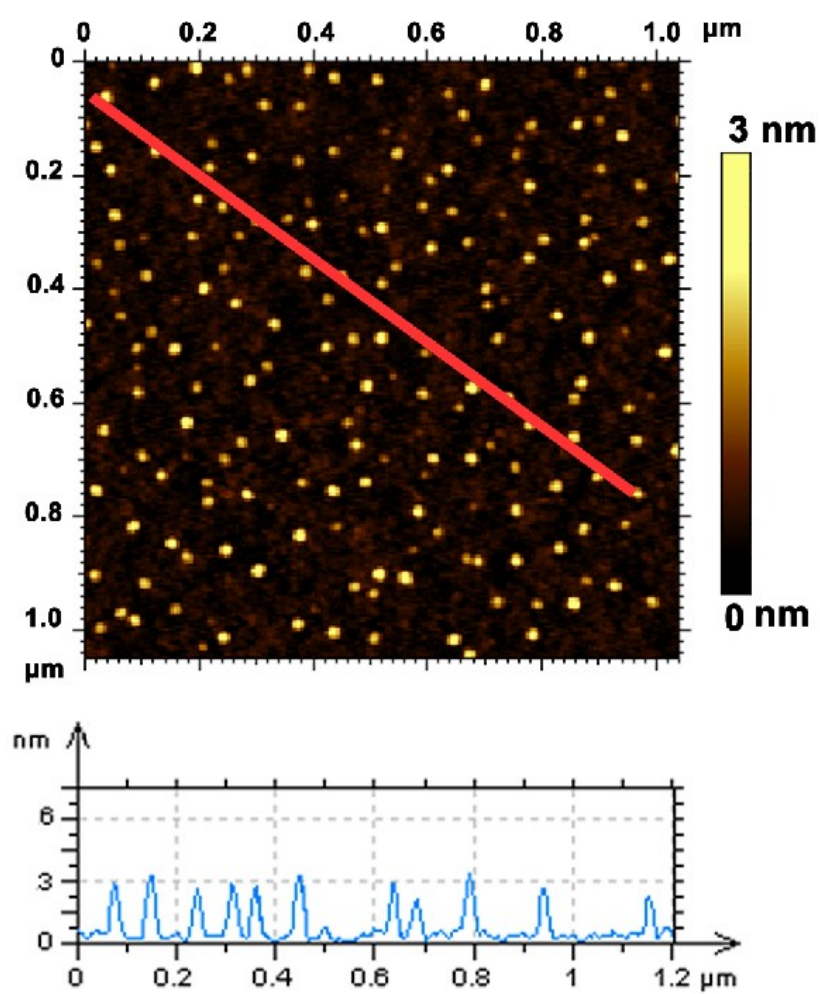

**Fig. S7** AFM image of the heights or sizes of N-CDs after interaction with CA125-aptamer.

**Table S1.** Comparison of the performance of different methods for CA125.

| Method          | Material                       | Detection limit | Ref.      |
|-----------------|--------------------------------|-----------------|-----------|
| Amperometric    | Sandwich chip                  | 0.1 U/mL        | S1        |
| Fluorescence    | Ag <sub>2</sub> S quantum dots | 0.07 ng/mL      | S2        |
| electrochemical | Gold nanostructures            | 5.5 U/mL        | S3        |
| GMR biosensor   | Giant Magnetoresistive         | 3.7 U/mL        | S4        |
| Fluorescence    | Cy5-DNA/GO                     | 0.05 U/mL       | S5        |
| Fluorescence    | DNA-AgNCs                      | 1.26 ng/mL      | S6        |
| Amperometric    | Molecular imprinted biosensor  | 0.5 U/mL        | S7        |
| Fluorescence    | Magnetic nanoparticles         | 0.26 U/mL       | S8        |
| Fluorescence    | N-CDs                          | 0.035 U/mL      | This work |

### Reference

S1 Das, J.; Kelley, S. O. *Anal. Chem.* **2011**, *83*, 1167-1172.

S2 Jin, H.; Gui, R.J.; Gong, J.; Huang, W. X.; *Biosens. Bioelectron.* **2017**, *92*, 378-384.

S3 Torati, S. R.; Kasturi, K. C.S.B.; Lim. B.; Kim, C. G. *Sens. Actuators B: Chem.* **2017**, *243*, 64-71.

S4 Klein, T.; Wang, W.; Yu, L. N.; Wu, K.; Boylan, K. L.M.; Vogel, R. I.; Skubitz, A. P.N.; Wang, J. P. *Biosens. Bioelectron.* **2018** (<https://doi.org/10.1016/j.bios.2018.10.046>).

S5 Chen, F.; Liu, Y.; Chen, C. Y.; Gong, H.; Cai, C. Q.; Chen, X. M. *Sens. Actuators B: Chem.* **2017**, *245*, 470-476.

S6 Wang, Y. Y.; Wang, S. S.; Lu, C. S.; Yang, X. M. *Sens. Actuators B: Chem.* **2018**, *262*, 9-16.

S7 Viswanathan, S.; Rani, C.; Ribeiro, S.; Delerue-Matos, C.; *Biosens. Bioelectron.* **2012**, *33*, 179-183.

S8 Pal, M. K.; Rashid, M.; Bisht, M. *Biosens. Bioelectron.* **2015**, *73*, 146-152.

**Table S2** Detection of CA125 in human serum.

| Sample                  | CA 125 (U/mL)        |             |
|-------------------------|----------------------|-------------|
|                         | Detected in hospital | This method |
| Healthy people          | 1                    | 5.7         |
|                         | 2                    | 9.8         |
|                         | 3                    | 12.3        |
| ovarian cancer patients | 4                    | 312         |
|                         | 5                    | 557         |
|                         | 6                    | 924         |
